# Supplementary material
Source: PubMed Central journal article supplement (PMC428476)
Supplement: pnas_101_24_9079__1.pdf [file pnas_101_24_9079__1.pdf]

**Table 1. Gene expression changes in NIH 3T3-Fusion 1-expressing cells**

| Acc. no.                                 | Fold change | Protein name                             | Function                               | Acc. no.                                              | Fold change | Protein name                              | Function                             |
|------------------------------------------|-------------|------------------------------------------|----------------------------------------|-------------------------------------------------------|-------------|-------------------------------------------|--------------------------------------|
| <b><u>Cytokines, immunoreceptors</u></b> |             |                                          |                                        | <b><u>Cell cycle / apoptosis</u></b>                  |             |                                           |                                      |
| M19681*                                  | -19.8       | Small inducible cytokine A2 (Ccl2)       | CC chemokine                           | AA914734*                                             | -68.2       | Prostate apoptosis response               | Transcription, growth repression     |
| X70058*                                  | -14.5       | Small inducible cytokine A7 (Ccl7)       | CC chemokine                           | U20344*                                               | 2.9         | Kruppel-like factor                       | Suppression of apoptosis             |
| AA270365*                                | 40.7        | Cytokine receptor-like factor 1          | Inflammatory cytokine receptor subunit | D76440                                                | 416.9       | Necdin                                    | G <sub>1</sub> /S progression        |
| AF000236*                                | 46.7        | Chemokine orphan receptor 1              | Cytoskeleton - ECM interaction         | <b><u>Proliferation/transformation</u></b>            |             |                                           |                                      |
| <b><u>Intracellular signaling</u></b>    |             |                                          |                                        | X16009                                                |             | Mitogen-regulated protein, proliferin 3   | Stimulates cell proliferation        |
| U27195*                                  | -20.5       | Leukotriene C4 synthase                  | Inflammatory mediator                  | AB009245*                                             | -12.7       | Stem cell growth factor                   | Hematopoietic cell proliferation     |
| L38444*                                  | -17.3       | T cell-specific GTPase                   | T cell activation, development         | M31885*                                               | 2.9         | Inhibitor of DNA binding 1                | G <sub>1</sub> progression           |
| X78545*                                  | -12.9       | Mast cell protease 8                     | Serine protease                        | X52533                                                | 3.3         | Male germ cell specific zinc finger prot. | Transcription factor                 |
| J03776*                                  | -11.3       | Tripartite motif protein 30              | T cell regulation                      | M14223                                                | 4.0         | Ribonucleotide reductase                  | Tumorigenesis and metastasis         |
| X83601*                                  | 2.9         | Pentaxin                                 | Prevent autoimmunity                   | AF055889                                              | 4.0         | Four and a half LIM domains               | β-catenin activity in cancer cells   |
| AW049768*                                | 3.4         | Lipocalin 7                              |                                        | <b><u>Stress-induced genes</u></b>                    |             |                                           |                                      |
| AF037370*                                | 4.7         | Cyclooxygenase 1                         | Immune system signaling                | U22033*                                               |             | Proteasome subunit beta 8                 | Proteasome complex subunit           |
| D13458*                                  | 8.7         | Prostaglandin E2 receptor                | cAMP metabolism, inflammation          | U77630                                                | -46.4       | Adrenomedullin                            | Blood pressure regulation            |
| M58661*                                  | 30.6        | Cell differentiation 24a antigen         | B cell signaling                       | AW061016*                                             | 3.1         | Vitamin D receptor                        | Calcium absorption, detoxification   |
| <b><u>DNA synthesis &amp; repair</u></b> |             |                                          |                                        | AI854020*                                             | 7.3         | Cysteine dioxygenase                      | Cysteine degradation                 |
| U57334*                                  | 8.9         | Meis-related gene 2                      | Homeobox gene; hematopoiesis           | <b><u>Miscellaneous</u></b>                           |             |                                           |                                      |
| <b><u>Adhesion/ECM/cytoskeleton</u></b>  |             |                                          |                                        | AB031292                                              |             | Proteolipid protein 2                     | Myelin                               |
| X66402*                                  | -285.6      | Metalloproteinase 3                      | Tumor invasion                         | AJ002366                                              | -22.8       | General transcription factor              | RNA II Pol subunit                   |
| AB017202*                                | -95.4       | Entactin-2                               | Basement membrane component            | AF041847                                              | 9.21        | Cardiac responsive adriamycin protein     | Nuclear modulator of gene expression |
| Y13185*                                  | -21.4       | Matrix metalloproteinase 10              | Mucosal destruction                    | X72697                                                | 10.1        | XMR                                       | Meiosis regulated                    |
| X04647*                                  | 2.9         | Collagen IV                              | Adhesion, invasion                     | <hr/>                                                 |             |                                           |                                      |
| AA647799*                                | 3.4         | Osteoglycin                              | Connective tissue component            | XMR, X-meiosis-regulated; ECM, extracellular matrix . |             |                                           |                                      |
| AI852765*                                | 3.9         | Glypican                                 | Innate immune response regulation      | * Immunoregulatory-related genes                      |             |                                           |                                      |
| L47600*                                  | 3.9         | Troponin T                               | Thin filament protein contraction      |                                                       |             |                                           |                                      |
| 100778                                   | 5.4         | Wisp2                                    | Connective tissue growth factor        |                                                       |             |                                           |                                      |
| AV364086*                                | 5.5         | Thrombomodulin                           | Wound healing                          |                                                       |             |                                           |                                      |
| AB007848*                                | 8.3         | Osteomodulin                             | ECM biomineralization                  |                                                       |             |                                           |                                      |
| X53929*                                  | 8.7         | Decorin                                  | Ontogenesis and tissue remodeling      |                                                       |             |                                           |                                      |
| M70642*                                  | 12.9        | Connective tissue growth factor          | ECM synthesis & wound healing          |                                                       |             |                                           |                                      |
| M12347*                                  | 27.7        | Actin                                    | Thin filament protein contraction      |                                                       |             |                                           |                                      |
| D00613                                   | 31.1        | Matrix gla protein                       | Cartilage calcification                |                                                       |             |                                           |                                      |
| AF031919                                 | 41.8        | Sarcoglycan epsilon                      | Membrane-ECM interaction               |                                                       |             |                                           |                                      |
| AW122909                                 | 52.4        | N-acetylated alpha-linked dipeptidase II | Neurotransmitter                       |                                                       |             |                                           |                                      |
| <b><u>Metabolism</u></b>                 |             |                                          |                                        |                                                       |             |                                           |                                      |
| AA726364*                                | 10.2        | Lipoprotein lipase                       | Lipoprotein metabolism                 |                                                       |             |                                           |                                      |
