# Supplementary material
Source: PubMed Central journal article supplement (PMC428476)
Supplement: pnas_101_24_9079__2.pdf [file pnas_101_24_9079__2.pdf]

**Table 2. Gene expression changes in NIH 3T3-Fusion 2-expressing cells**

| Acc. No.                                 | Fold change | Protein name                        | Function                            | Acc. No.                                 | Fold change | Protein name                    | Function                      |
|------------------------------------------|-------------|-------------------------------------|-------------------------------------|------------------------------------------|-------------|---------------------------------|-------------------------------|
| <b><u>Cytokines, immunoreceptors</u></b> |             |                                     |                                     | <b><u>Metabolism</u></b>                 |             |                                 |                               |
| AF002719*                                | 5.9         | Secretory leukoprotease inhibitor   | Inflammation                        | AA726364*                                | -3.1        | Lipoprotein lipase              | Lipoprotein metabolism        |
| AF065947*                                | 8.1         | Small inducible cytokine A5         | Chemokine (C-C) chemotaxis          | <b><u>Cell cycle / apoptosis</u></b>     |             |                                 |                               |
| <b><u>Intracellular signaling</u></b>    |             |                                     |                                     | D76440                                   | 19.5        | Necdin                          | G <sub>1</sub> /S progression |
| X51547                                   | -22.7       | Lysozyme P                          | Structural component of lysozyme P  | <b><u>DNA synthesis &amp; repair</u></b> |             |                                 |                               |
| M21050                                   | -21.9       | Lysozyme M                          | Antiinflammatory response           | D30782                                   | -7.1        | Epiregulin                      | DNA synthesis                 |
| X78545                                   | -20.8       | Mast cell protease 8                | Serine protease                     | <b><u>Stress-induced genes</u></b>       |             |                                 |                               |
| AB015978*                                | -3.7        | Oncostatin receptor                 | MAP kinase activation, inflammation | U49430*                                  | 15.5        | Ceruloplasmin                   | Iron detoxification           |
| M58661*                                  | 6.6         | CD24a antigen                       | PI anchor, B cell development       | <b><u>Miscellaneous</u></b>              |             |                                 |                               |
| M80631                                   | 10.4        | Guanine nucleotide binding protein  | G-protein                           | U88566*                                  | -4.9        | Secreted frizzled related prot. | Angiogenesis                  |
| D86370*                                  | 22.0        | Megakaryocyte-potentiating factor   | Megakaryocyte development           | L02914*                                  | 15.2        | Aquaporin                       | Water channel                 |
| <b><u>Adhesion/ECM/cytoskeleton</u></b>  |             |                                     |                                     | X96603                                   | 15.2        | Ovary testis transcribed        | Meiosis regulation            |
| D13664                                   | -13.5       | Osteoblast-specific factor 2        | Bone adhesion                       | X72697                                   | -35.5       | XMR                             | Meiosis regulated             |
|                                          | -12.2       | Tetranectin                         | Tissue remodeling                   |                                          | -7.1        |                                 |                               |
| L23769                                   | -11.2       | Microfibril-associated glycoprotein | Elastic fiber assembly & synthesis  |                                          |             |                                 |                               |
| AB017202                                 | -10.6       | Entactin-2                          | Basement membrane                   |                                          |             |                                 |                               |
| M70642*                                  | -4.6        | Fisp 12                             | ECM synthesis                       |                                          |             |                                 |                               |
| X13986*                                  | 5.5         | Minopontin                          | Adhesion, inflammation              |                                          |             |                                 |                               |

MAP, mitogen-activated protein; PI, phosphatidylinositol ; XMR, X-meiosis-regulated ; ECM, extracellular matrix .

\* Immunoregulatory-related genes.
